# Supplementary material for: Bioinformatics Analysis Identifies EPAS1 as a Novel Prognostic Marker Correlated with Immune Infiltration in Acute Myeloid Leukemia
Source: Hindawi journal article supplement (doi:10.1155/2023/6072782), 2023-04-17
Supplement: f1 [file 6072782.f1.pdf]

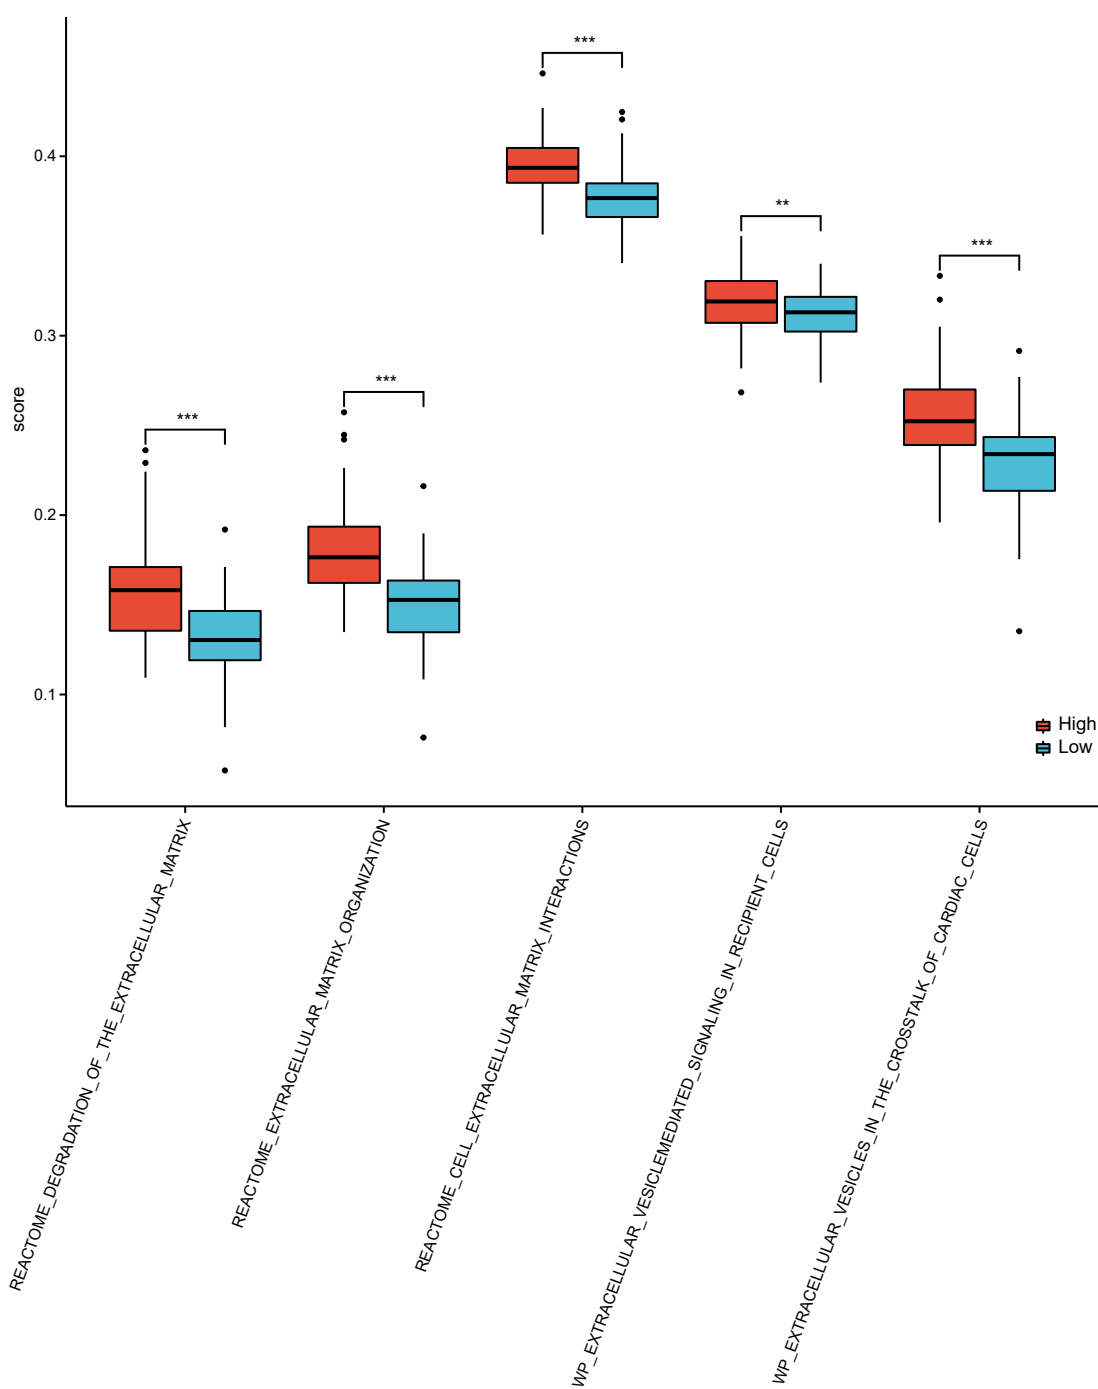

Supplementary Figure 1: Differences in the enrichment scores of extracellular matrix-related pathways between high and low EPAS1 expression groups.
