# Supplementary material for: Bioinformatics Analysis Identifies EPAS1 as a Novel Prognostic Marker Correlated with Immune Infiltration in Acute Myeloid Leukemia
Source: Hindawi journal article supplement (doi:10.1155/2023/6072782), 2023-04-17
Supplement: f2 [file 6072782.f2.pdf]

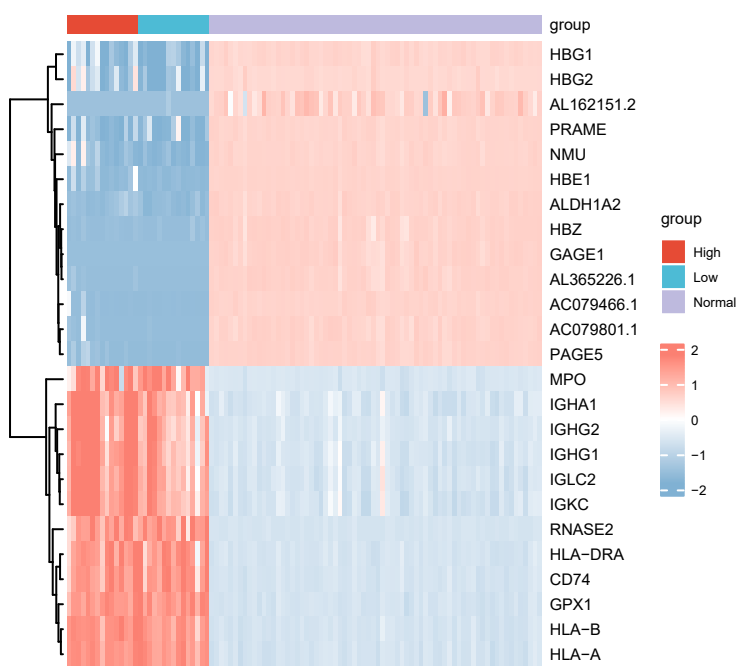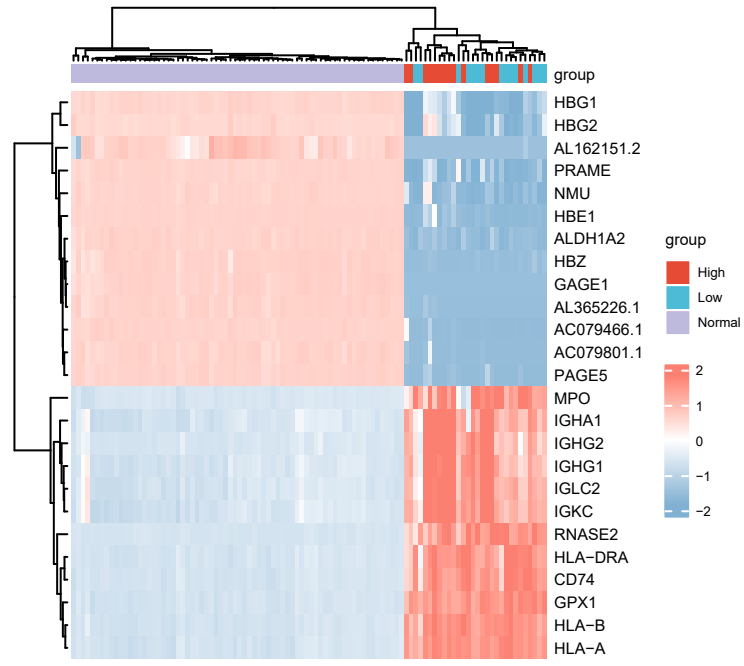

Supplementary Figure 2: Top 25 genes differentially expressed in high and low EPAS1 expression groups and normal control group.
